# Supplementary material
Source: Springer Nature journal article supplement (https://www.springermedizin.de/resource/supplementary/12908_2002_7_MOESM4_ESM.pdf/9525212)

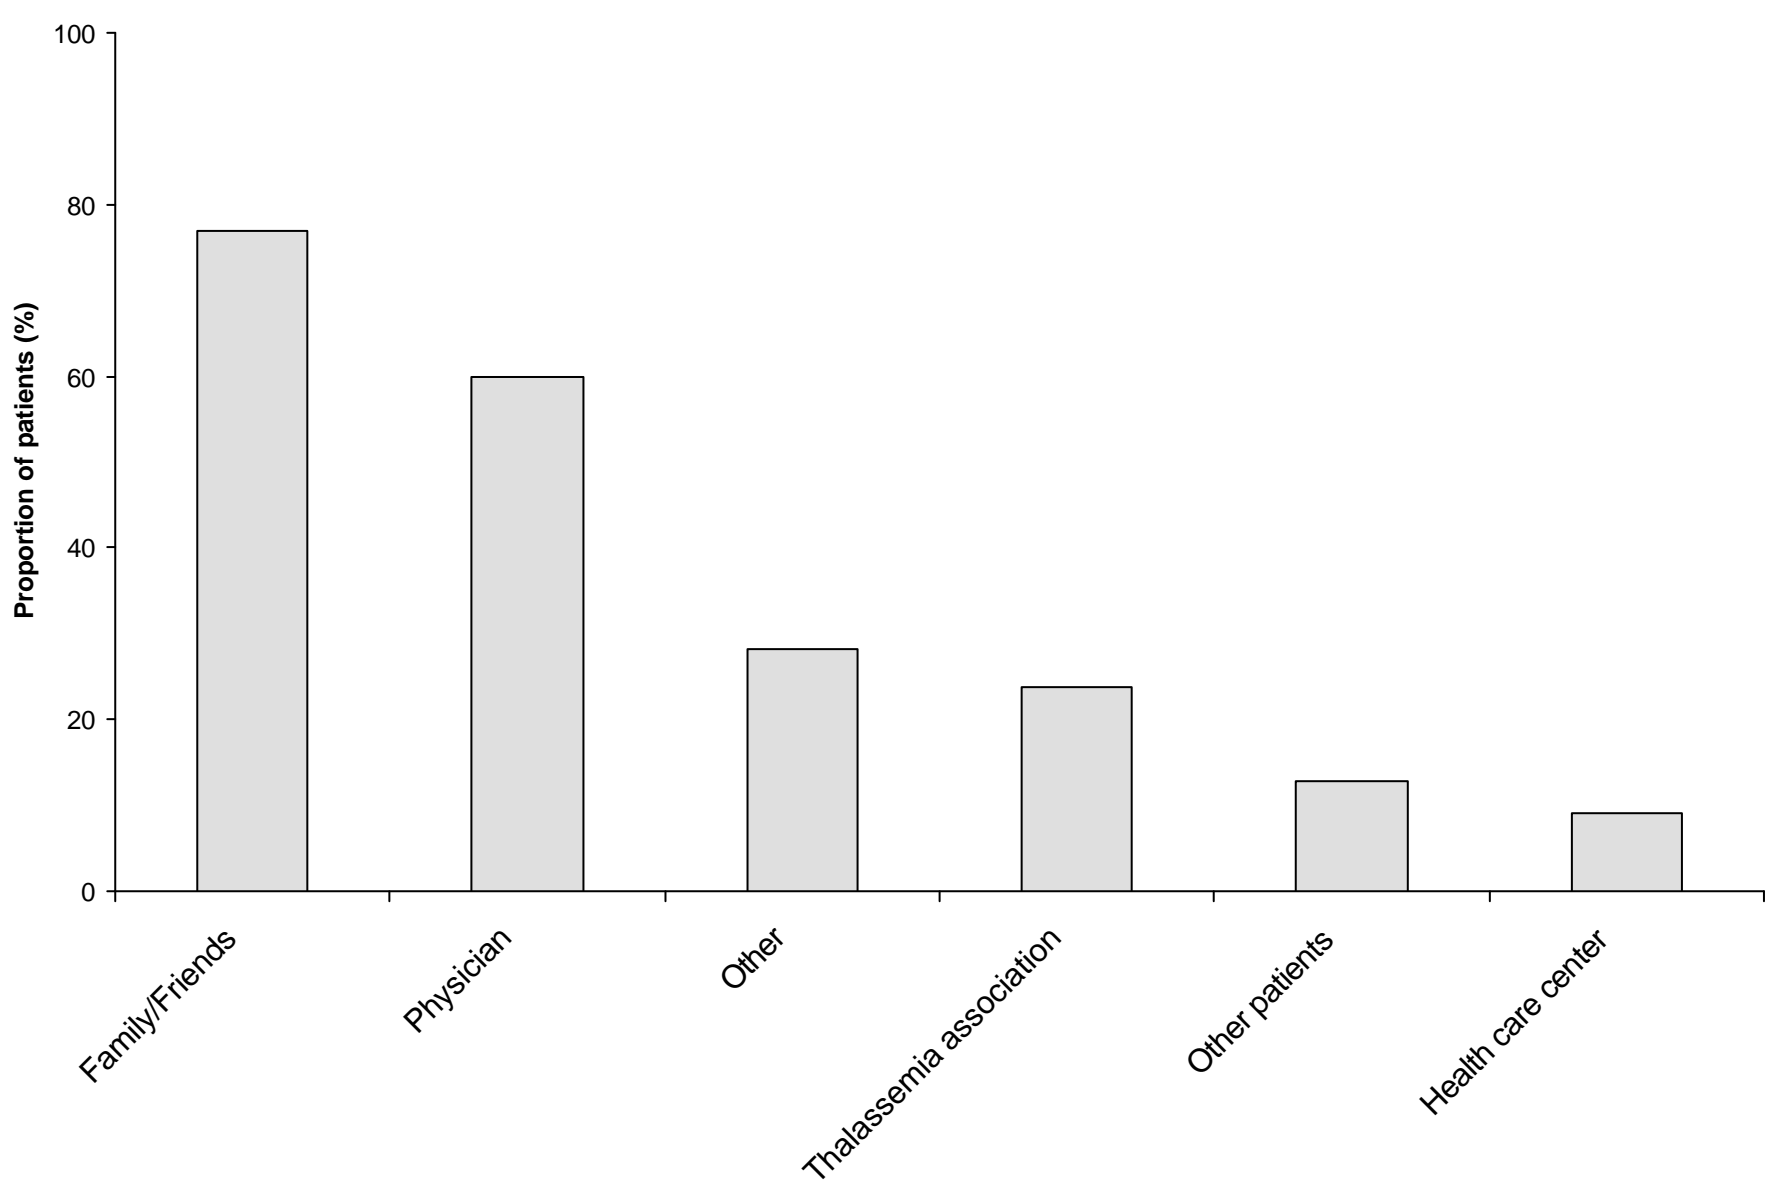

Supplement: MOESM4 [file 9525212]
